# Supplementary material
Source: PubMed Central journal article supplement (PMC2758145)

Figure S1: Plot of clusters from principal components analysis of 3867 controls and 911 cases.

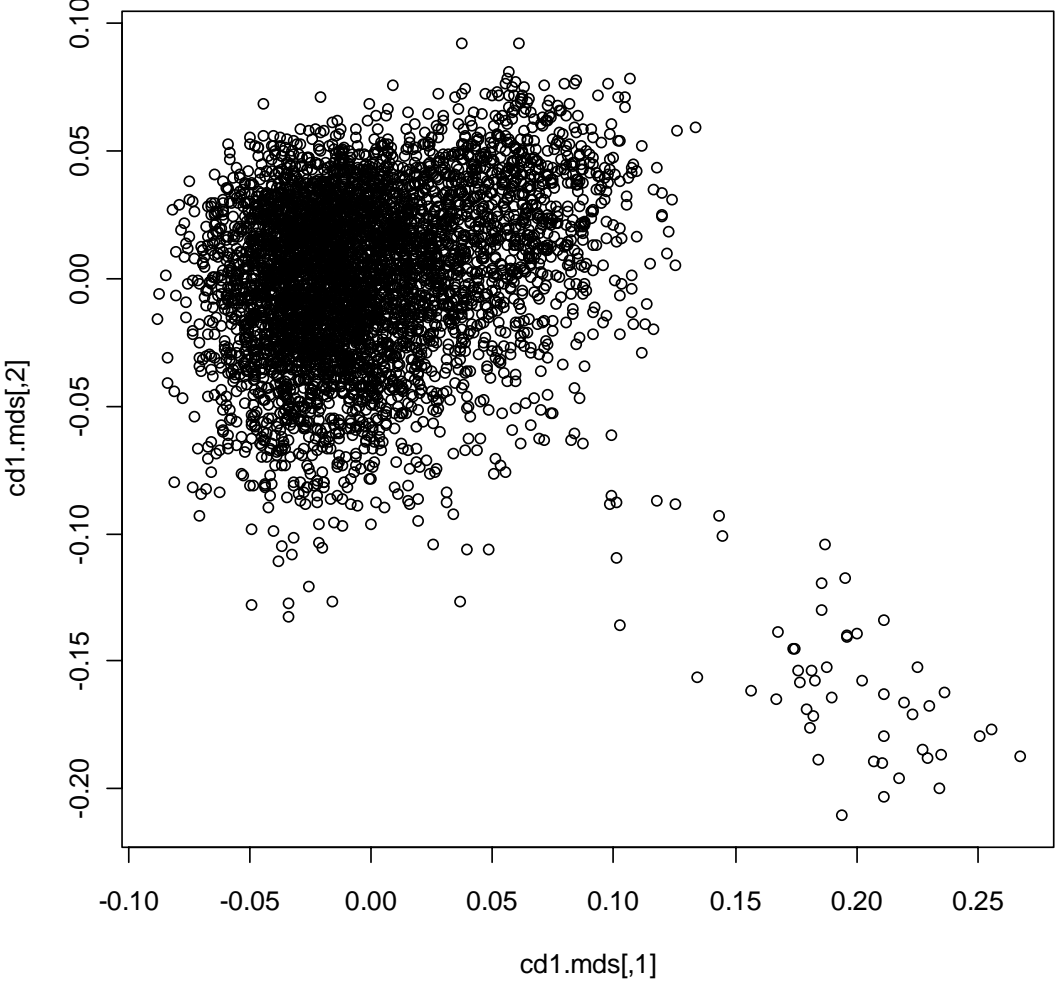

Figure S2: Plot of clusters from principal components analysis of 3867 controls.

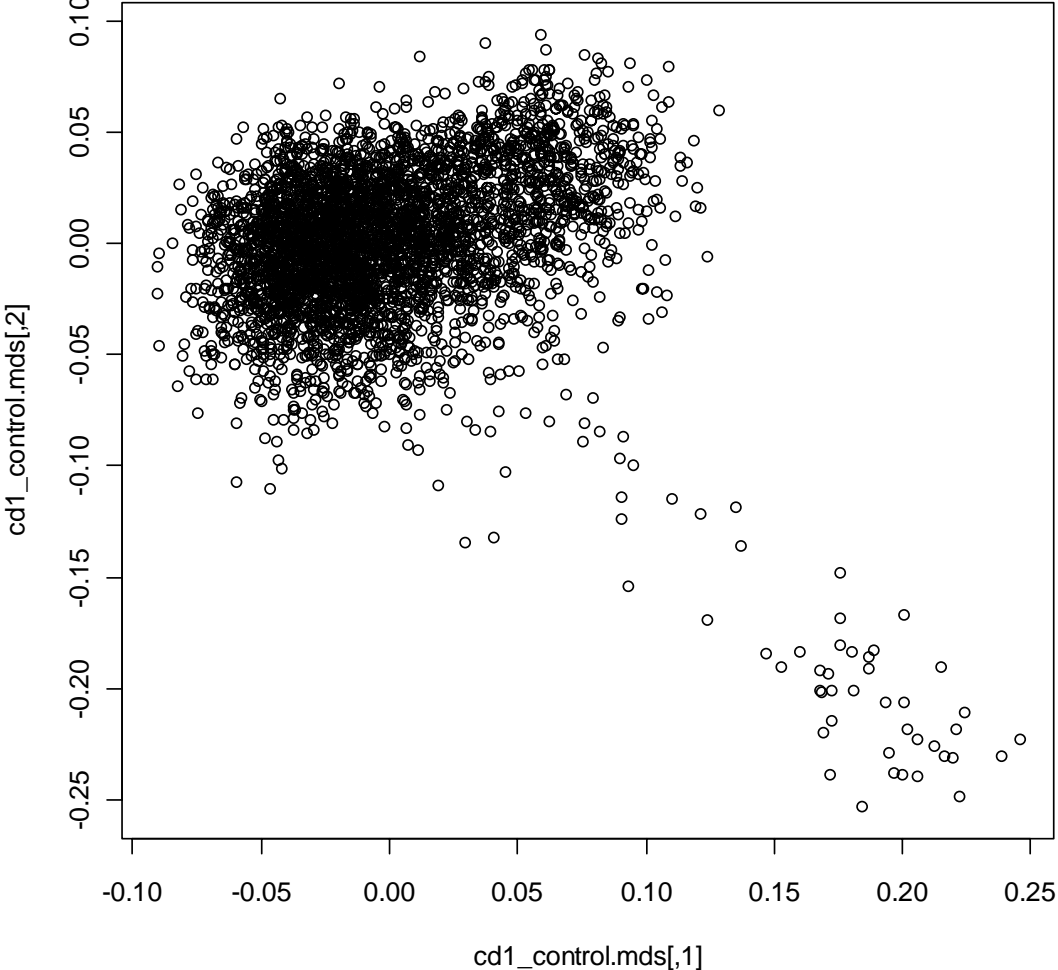

Figure S3: Plot of clusters from principal components analysis of 911 cases.

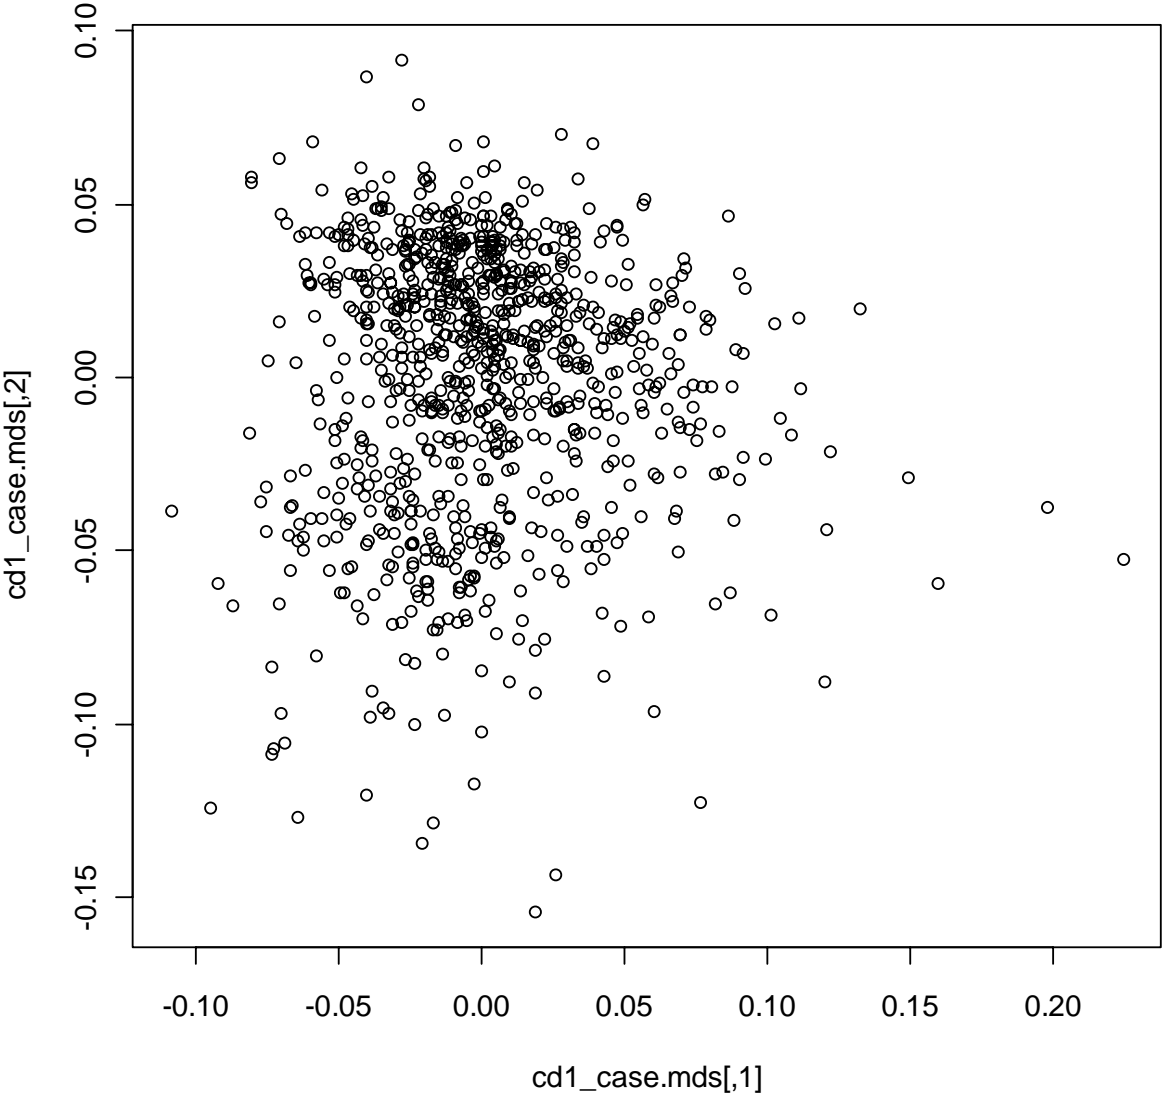

Figure S4: Q-Q plot including all SNPs

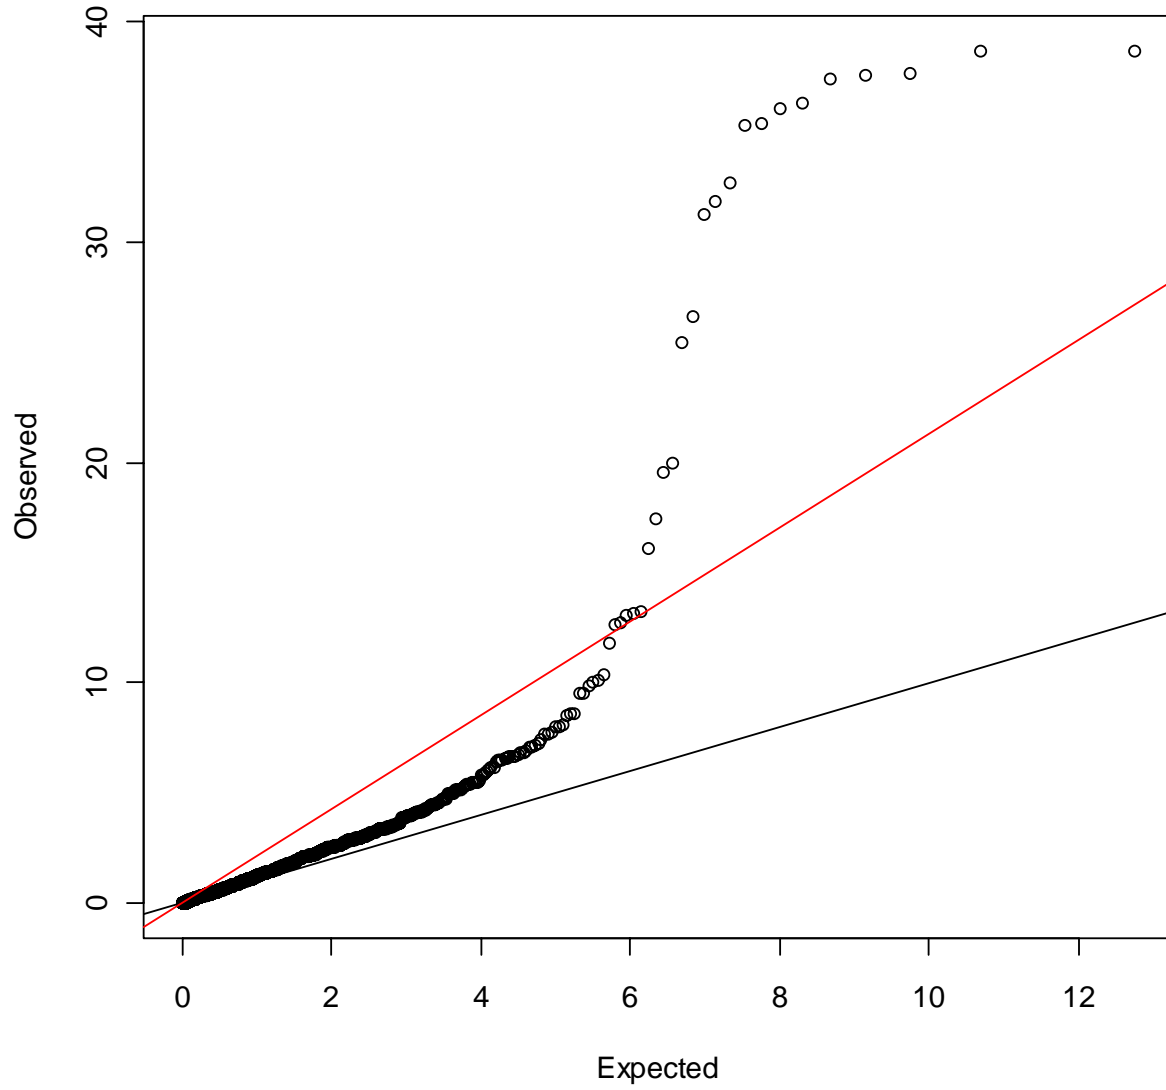

Figure S5: Q-Q plot after excluding all SNPs on chromosomes 1q31, 2q31, 3q25, 3q28, 4q27 and 12q24.

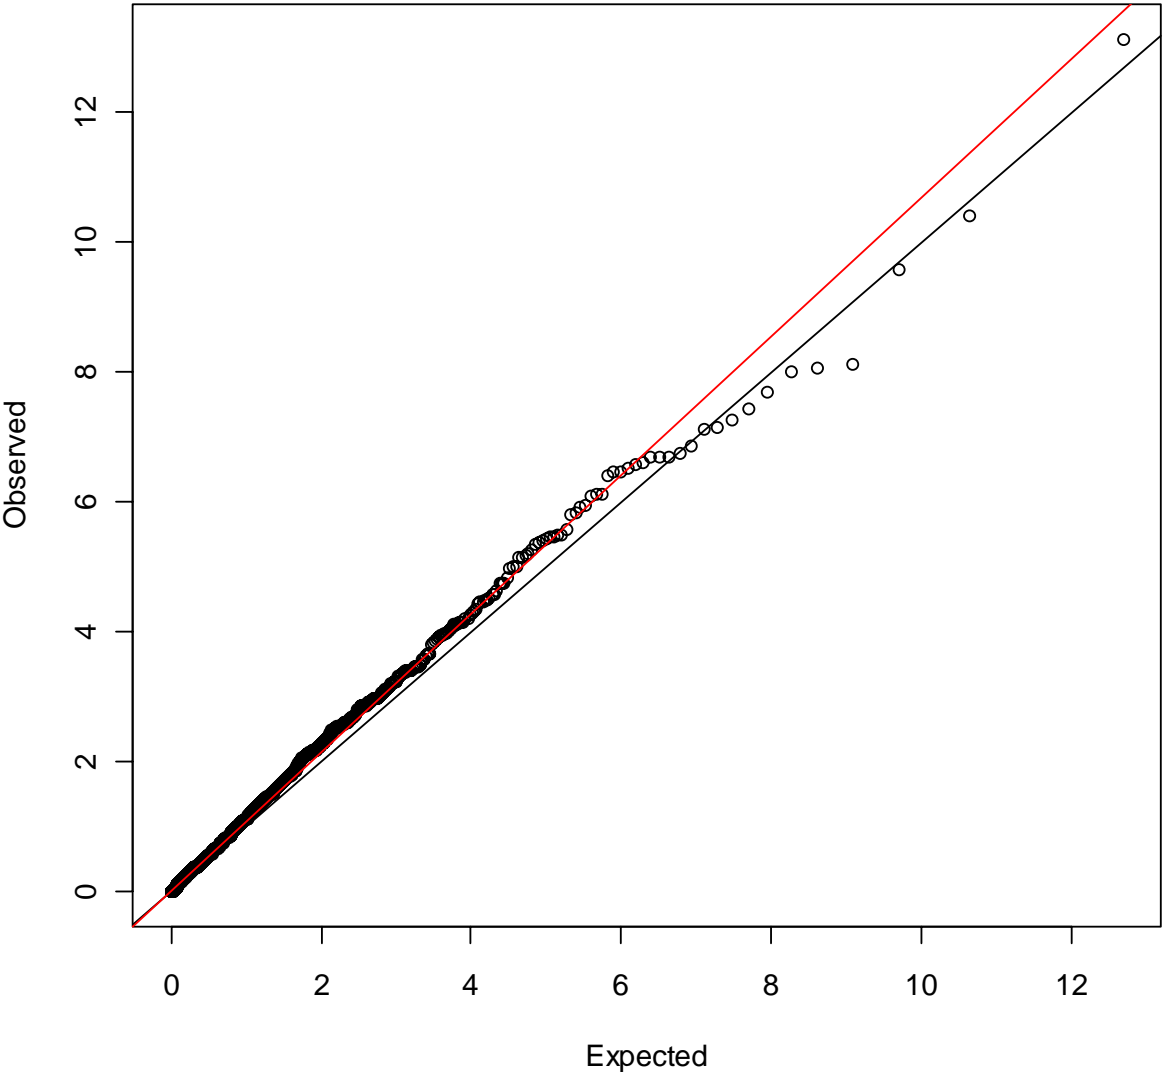

Supplement: ddp364_1.pdf [file ddp364_1.pdf]
